# Supplementary material for: Predicting the Role of IL-10 in the Regulation of the Adaptive Immune Responses in Mycobacterium avium Subsp. paratuberculosis Infections Using Mathematical Models
Source: PLoS One. 2015 Nov 30;10(11):e0141539. doi: 10.1371/journal.pone.0141539 (PMC4664406; doi:10.1371/journal.pone.0141539)
Supplement: S2 Table — Terms used to model the production of IL10 in the cell compartmental model and their corresponding AIC values. The term, θ 3 I m Th 0, was selected to model IL10 because of its associated AIC value. (DOCX) [file pone.0141539.s008.docx]

Table S2: **Selecting terms that are used to generate IL-10 in the models**

| Terms | AIC |
| --- | --- |
|  | 9.66 |
|  | 17.57 |
|  | 16.90 |

Terms used to model the production of IL10 in the cell compartmental model and their corresponding AIC values. The term, was selected to model IL10 because of its associated AIC value.
